# Supplementary material for: Prevention and treatment of SHIVAD8 infection in rhesus macaques by a potent d-peptide HIV entry inhibitor
Source: PubMed Central journal article supplement (PMC7486783; doi:10.1073/pnas.2009700117), 2020-08-20
Supplement: pnas.2009700117.sapp.pdf [file pnas.2009700117.sapp.pdf]

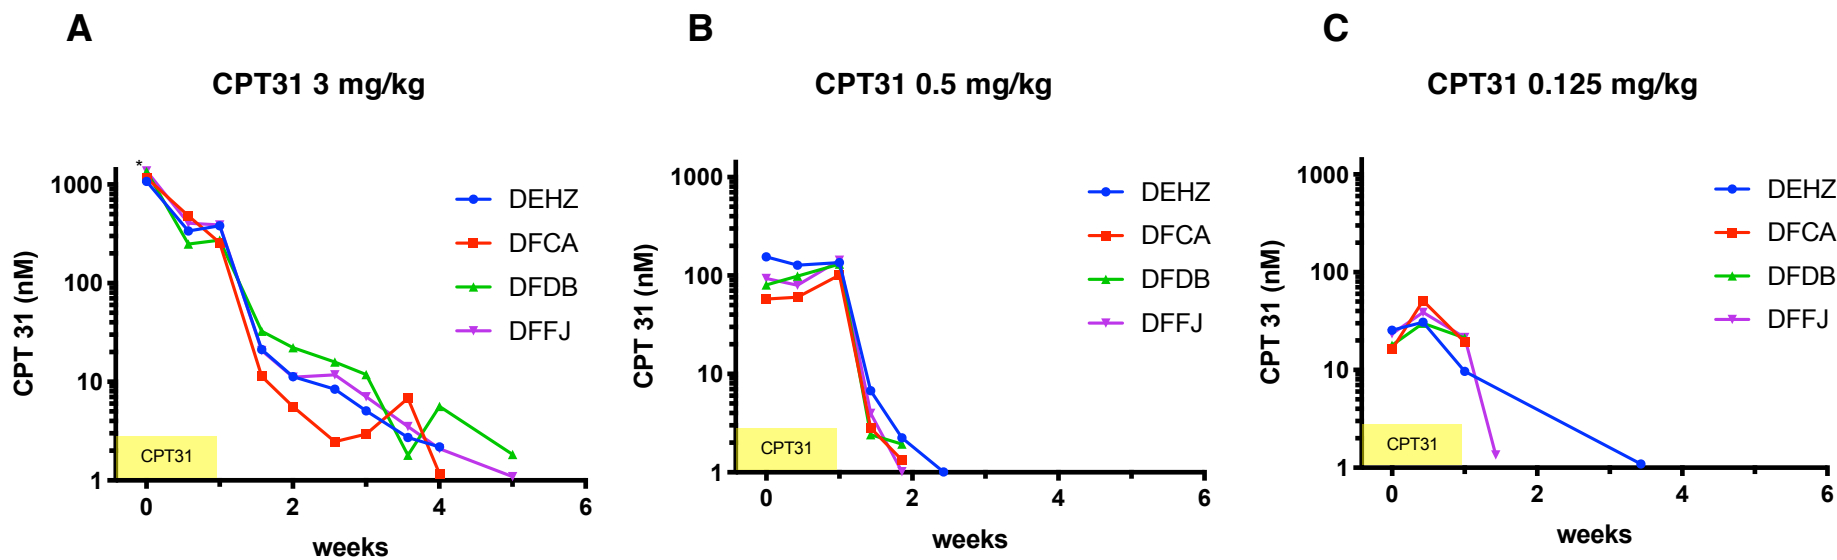

**Figure S1: Pharmacokinetic measurements of CPT31 levels during virus acquisition blocking studies.** Four monkeys were intramuscularly administered 3.0 (A), 0.5 (B), or 0.125 (C) mg/kg CPT31 daily, beginning on days -3 to day +7, at each time of SHIVAD8-EO challenge, respectively. Drug levels were measured using an LC-MS bioanalytical assay with an internal standard. The dosing periods are indicated in yellow.

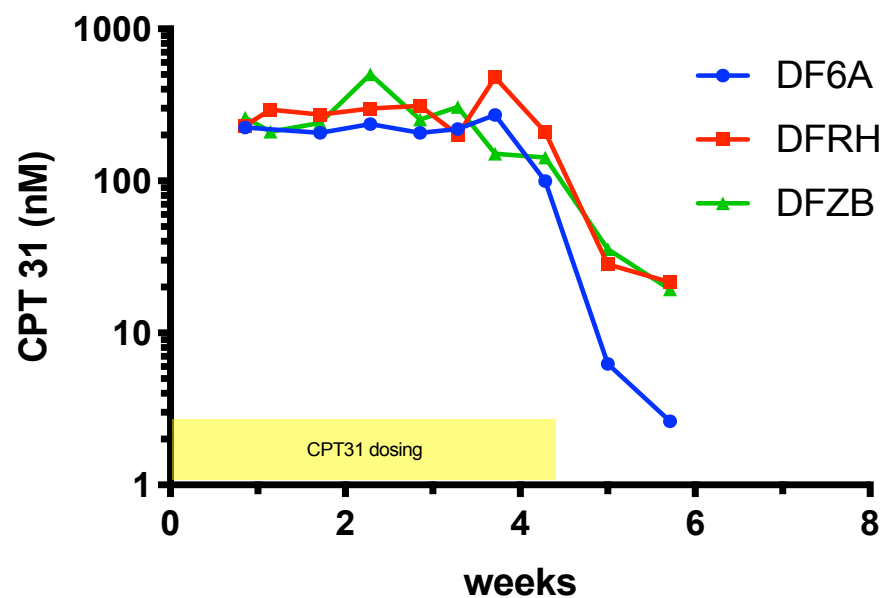

**Figure S2: Pharmacokinetic measurements of CPT31 during monotherapy of chronically infected SHIVAD8-EO rhesus macaques.** CPT31 was administered at 3 mg/kg/day. Drug levels were measured using an LC-MS bioanalytical assay with an internal standard. The dosing period is indicated in yellow.

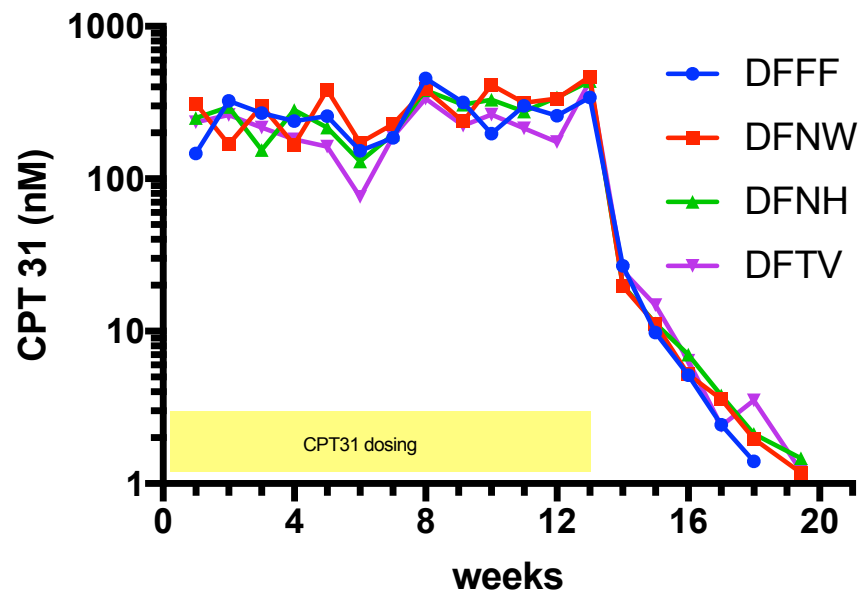

**Figure S3: Pharmacokinetic measurements of CPT31 in conjunction with cART treatment/cessation in chronically SHIVAD8-EO infected rhesus macaques.** CPT31 was administered at 3 mg/kg/day for 12 weeks between weeks 46 and 58 PI. Drug levels were measured using an LC-MS bioanalytical assay with an internal standard. Dosing period indicated in yellow.

**Q577R**

|              | AVGAIGAMFL | GFLGAAGSTM | GAASITLTVQ | ARLLLSGIVQ | QQNLLKAE  | AQQHLLQLTV | WGIKQLQARV | LAVERYLRDQ | QLLGIWGCSSG | KLICTTAVPW |
|--------------|------------|------------|------------|------------|-----------|------------|------------|------------|-------------|------------|
| DFFF (12/21) | -----      | -----      | -----      | -----      | -----     | -----      | -----      | -----      | -----       | -----      |
| DFFF (3/21)  | -----      | -----      | -----      | -----      | -R-       | -----      | -----      | -----      | -----       | -----      |
| DFFF (2/21)  | -----      | -----      | -----      | -----      | -----     | -----      | -----      | -----      | -----       | -----      |
| DFFF (2/21)  | -----      | -----      | -----      | -----      | -----     | -----      | -----      | -----      | -----       | -----      |
| DFFF (1/21)  | -----      | -----      | -----      | -----      | -----     | -----      | -----      | -----      | -----       | -----      |
| DFFF (1/21)  | -----      | -V-        | -----      | -----      | -----     | -----      | -----      | -----      | -----       | -----      |
| DFNH (11/11) | -----      | -V-        | -----      | -----      | -----     | -----      | -----      | -----      | -----       | -----      |
| DFNW (19/30) | -----      | -----      | -----      | -----      | -----     | -----      | -----      | -----      | -----       | -----      |
| DFNW (5/30)  | -----      | -R-        | -----      | -----      | -----     | -----      | -----      | -----      | -----       | -----      |
| DFNW (3/30)  | -----      | -----      | -----      | -----      | -----     | -----      | -----      | -----      | -----       | -----      |
| DFNW (3/30)  | -----      | -----      | -----      | -----      | -----     | -----      | -----      | -----      | -----       | -----      |
| DFTV (12/21) | -----      | -----      | -----      | -----      | -----     | -----      | -----      | -----      | -----       | -----      |
| DFTV (7/21)  | -----      | -----      | -----      | -Q-        | -----     | -----      | -R-        | -----      | -----       | -----      |
| DFTV (2/21)  | -----      | -----      | -----      | -----      | -----     | -----      | -R-        | -----      | -----       | -----      |
|              |            |            |            |            |           |            |            |            |             |            |
|              | NASWSNKTL  | MIWNNMTWME | WEREIDNYTG | LIYTLIEESQ | NQEKNEQEL | LELDKASLW  | NWFDITNWLW | YIK        |             |            |
| DFFF (12/21) | -----      | -----      | -----      | -----      | -----     | -----      | -----      | ---        |             |            |
| DFFF (3/21)  | -----      | -----      | -----      | -----      | -----     | -----      | -----      | ---        |             |            |
| DFFF (2/21)  | -----      | -----      | -N-        | -----      | -----     | -----      | -----      | ---        |             |            |
| DFFF (2/21)  | -----      | -----      | -G-        | -----      | -----     | -----      | -----      | ---        |             |            |
| DFFF (1/21)  | -----      | -----      | -----      | -L-        | -----     | -G-        | -----      | ---        |             |            |
| DFFF (1/21)  | -----      | -----      | -----      | -----      | -----     | -----      | -----      | ---        |             |            |
| DFNH (11/11) | -----      | -----      | -----      | -----      | -----     | -----      | -----      | ---        |             |            |
| DFNW (19/30) | -----      | -----      | -----      | -----      | -----     | -----      | -----      | ---        |             |            |
| DFNW (5/30)  | -----      | -----      | -----      | -----      | -----     | -G-        | -----      | ---        |             |            |
| DFNW (3/30)  | -----      | -----      | -D-D       | -----      | -----     | -----      | -----      | ---        |             |            |
| DFNW (3/30)  | -----      | -----      | -D         | -----      | -----     | -----      | -----      | ---        |             |            |
| DFTV (12/21) | -----      | -----      | -----      | -----      | -----     | -----      | -----      | ---        |             |            |
| DFTV (7/21)  | -----      | -----      | -----      | -----      | -----     | -----      | -----      | ---        |             |            |
| DFTV (2/21)  | -----      | -----      | -----      | -----      | -----     | -----      | -----      | ---        |             |            |

**Figure S4: Sequence analyses of gp41 gene segments in SHIVAD8-EO chronically infected macaques treated with cART and then with CPT31 monotherapy.** Viral RNA was amplified by RT-PCR from plasma collected at week 62. The Q577R changes identified in found in animal DFTV are highlighted.

Table S1: Inhibitory breadth of CPT31 against the CAVD 118-strain pseudovirion panel.

| Strain          | Clade | CPT31<br>IC <sub>50</sub><br>(pM) |
|-----------------|-------|-----------------------------------|
| 191084_B7_19    | A     | 1                                 |
| 211_9           | A     | 2                                 |
| 928_28          | A     | 3                                 |
| 0815_V3_C3      | A     | 4                                 |
| 3365_V2_C20     | A     | 4                                 |
| MS208_A1        | A     | 10                                |
| 6540_V4_C1      | A     | 10                                |
| Q23_17          | A     | 20                                |
| Q461_E2         | A     | 20                                |
| 191955_A11      | A     | 20                                |
| T251_18         | A     | 20                                |
| 9004SS_A3_4     | A     | 20                                |
| Q769_D22        | A     | 20                                |
| 235_47          | A     | 30                                |
| T278_50         | A     | 30                                |
| 263_8           | A     | 30                                |
| 3817_V2_C59     | A     | 30                                |
| 6041_V3_C23     | A     | 40                                |
| 6545_V4_C1      | A     | 40                                |
| Q842_D12        | A     | 50                                |
| T250_4          | A     | 60                                |
| 3415_V1_C1      | A     | 60                                |
| T255_34         | A     | 60                                |
| 6480_V4_C25     | A     | 80                                |
| Q259_17         | A     | 80                                |
| 0260_V5_C36     | A     | 200                               |
| T257_31         | A     | 240                               |
| R2184_C4        | AE    | 3                                 |
| C3347_C11       | AE    | 20                                |
| CNE8            | AE    | 20                                |
| C2101_C1        | AE    | 20                                |
| R3265_C6        | AE    | 20                                |
| R1166_C1        | AE    | 20                                |
| CNE5            | AE    | 30                                |
| BJOX028000_10_3 | AE    | 30                                |

|                   |    |     |
|-------------------|----|-----|
| C1080_C3          | AE | 40  |
| 620345_C1         | AE | 50  |
| BJOX025000_01_1   | AE | 50  |
| C4118_9           | AE | 80  |
| BJOX010000_06_2   | AE | 90  |
| BJOX009000_02_4   | AE | 160 |
| BJOX015000_11_5   | AE | 190 |
| AC10_29           | B  | 10  |
| SC422661_8        | B  | 10  |
| REJO4541_67       | B  | 20  |
| SC05_8C11_2344    | B  | 20  |
| 62357_14_D3_4589  | B  | 20  |
| 1012_11_TC21_3257 | B  | 20  |
| 1054_07_TC4_1499  | B  | 30  |
| WEAU_D15_410      | B  | 30  |
| WITO4160_33       | B  | 30  |
| TRJO4551_58       | B  | 30  |
| TRO_11            | B  | 40  |
| 6535_3            | B  | 40  |
| THRO4156          | B  | 50  |
| CAAN5342          | B  | 60  |
| 1056_10_TA11_1826 | B  | 60  |
| RHPA4259_7        | B  | 70  |
| 6240_08_TA5_4622  | B  | 80  |
| 6244_13_B5_4567   | B  | 100 |
| QH0692            | B  | 110 |
| 1006_11_C3_1601   | B  | 140 |
| PVO_4             | B  | 220 |
| ZM233_6           | C  | 4   |
| DU422             | C  | 10  |
| 249M_B10          | C  | 10  |
| DU156_12          | C  | 10  |
| DU172_17          | C  | 10  |
| 0013095_2_11      | C  | 10  |
| CE0393_C3         | C  | 10  |
| ZM249_1           | C  | 10  |
| ZM135_10A         | C  | 10  |
| CE704809221_1B3   | C  | 20  |
| CNE58             | C  | 20  |

|                    |   |     |
|--------------------|---|-----|
| CNE53              | C | 20  |
| ZM53_12            | C | 20  |
| CAP210_E8          | C | 20  |
| ZM214_15           | C | 20  |
| 6811_V7_C18        | C | 20  |
| CNE20              | C | 20  |
| ZM109_4            | C | 20  |
| CE1086_B2          | C | 20  |
| CNE17              | C | 20  |
| CNE19              | C | 20  |
| ZM197_7            | C | 20  |
| CE1172_H1          | C | 20  |
| CNE52              | C | 30  |
| 16055_2_3          | C | 30  |
| CNE21              | C | 30  |
| CAP45_G3           | C | 30  |
| CE2060_G9          | C | 30  |
| ZM247V1(REV_)      | C | 30  |
| CE0682_E4          | C | 30  |
| 3301_V1_C24        | C | 40  |
| 246F_C1G           | C | 40  |
| 001428_2_42        | C | 40  |
| 1394C9G1(REV_)     | C | 60  |
| CE703010054_2A2    | C | 60  |
| 3103_V3_C10        | C | 70  |
| BF1266_431A        | C | 80  |
| CNE30              | C | 80  |
| 16845_2_22         | C | 80  |
| CE1176_A3          | C | 110 |
| 7030102001E5(REV_) | C | 190 |
| CE2010_F5          | C | 490 |
| 231966_C2          | D | 10  |
| 6952_V1_C20        | D | 20  |
| A07412M1_VRC12     | D | 50  |
| 89_F1_2_25         | D | 60  |
| 3016_V5_C45        | D | 80  |
| 6405_V4_C34        | D | 140 |
| 231965_C1          | D | 240 |
| X1254_C3           | G | 10  |

|              |   |    |
|--------------|---|----|
| X1193_C1     | G | 20 |
| X1632_S2_B10 | G | 20 |
| X2088_9      | G | 20 |
| P1981_C5_3   | G | 30 |
| X2131_C1_B5  | G | 30 |
| P0402_C2_11  | G | 40 |



Table S2: Inhibitory breadth of CPT31 against 60-strain international panel of replication-competent virus obtained from the NIH AIDS Reagent Program. Note that three strains were excluded due to insufficient titer (see Methods).

| Strain      | Clade | Normalized luminescence |             |
|-------------|-------|-------------------------|-------------|
|             |       | 1 nM CPT31              | 10 nM CPT31 |
| 92UG029     | A     | 0.048                   | 0.018       |
| KER2008     | A     | 0.035                   | 0.011       |
| KER2018     | A     | 0.052                   | 0.025       |
| KNH1088     | A     | 0.015                   | 0.004       |
| KNH1135     | A     | 0.046                   | 0.024       |
| KNH1144     | A     | 0.079                   | 0.015       |
| KNH1207     | A     | 0.079                   | 0.018       |
| KNH1209     | A     | 0.057                   | 0.048       |
| KSM4030     | A     | 0.064                   | 0.044       |
| 93RW024     | A     | 0.03                    | 0.007       |
| M02138      | AE    | 0.048                   | 0.02        |
| CM235/GS020 | AE    | 0.162                   | 0.017       |
| CM244       | AE    | 0.046                   | 0.005       |
| CM240/GS022 | AE    | 0.134                   | 0.024       |
| NI1046      | AE    | 0.009                   | 0.003       |
| NI1052      | AE    | 0.02                    | 0.003       |
| NI1149      | AE    | 0.071                   | 0.026       |
| NP1251      | AE    | 0.03                    | 0.016       |
| NP1525      | AE    | 0.012                   | 0.002       |
| NP1695      | AE    | 0.043                   | 0.03        |
| 55815       | AG    | 0.012                   | 0.005       |
| CAM0002     | AG    | 0.044                   | 0.003       |
| CAM0013     | AG    | 0.016                   | 0.003       |
| CAM0014     | AG    | 0.012                   | 0.005       |
| CAM0015     | AG    | 0.04                    | 0.03        |
| CAM0005     | AG    | 0.016                   | 0.002       |
| CAM0008     | AG    | 0.032                   | 0.003       |
| CAM1475MV   | AG    | 0.017                   | 0.012       |
| CAM1970LE   | AG    | 0.027                   | 0.015       |
| DJ263/GS003 | AG    | 0.033                   | 0.008       |
| 873         | B     | 0.064                   | 0.013       |
| 33931N      | B     | 0.024                   | 0.009       |
| Ba-L        | B     | 0.031                   | 0.002       |
| BK132/GS009 | B     | 0.003                   | 0.002       |
| BX08        | B     | 0.058                   | 0.005       |
| BZ167       | B     | 0.006                   | 0.002       |
| MN/H9       | B     | 0.007                   | 0           |
| NP1538      | B     | 0.05                    | 0.006       |
| US1/GS0004  | B     | 0.047                   | 0.023       |
| US4/GS007   | B     | 0.089                   | 0.013       |
| 56313       | C     | 0.021                   | 0.007       |
| 20635-4     | C     | 0.01                    | 0.004       |
| PBL286      | C     | 0.042                   | 0.01        |
| PBL288      | C     | 0.97                    | 0.88        |

|             |   |       |       |
|-------------|---|-------|-------|
| SE364/GS015 | C | 0.084 | 0.023 |
| SM145/GS016 | C | 0.694 | 0.243 |
| TZA246      | C | 0.017 | 0.016 |
| TZA68       | C | 0.023 | 0.003 |
| 301965      | C | 0.039 | 0.023 |
| 93UG065     | D | 0.063 | 0.056 |
| A03349M1    | D | 0.064 | 0.005 |
| A07412M1    | D | 0.08  | 0.033 |
| A08483M1    | D | 0.062 | 0.026 |
| D26830M4    | D | 0.047 | 0.015 |
| E08464M4    | D | 0.068 | 0.019 |
| J32228M4    | D | 0.039 | 0.02  |
| NKU3006     | D | 0.028 | 0.002 |
